# Supplementary material for: KRAS mutation effects on the 2-[18F]FDG PET uptake of colorectal adenocarcinoma metastases in the liver
Source: Springer Nature journal article supplement (doi:10.1186/s13550-020-00707-0), 2020-11-23
Supplement: MOESM1 [file 18616062]

**SUPPLEMENT**

This supplement contains extensions for the case when *KRAS* gene amplification is grouped with *KRAS* missense mutation. The supplemental information in Tables S1.A and S1.B below can be considered as an extension to Table 4 in the paper. Similarly, Table S.2 is an extension to Table 5, Fig. S1 to Fig. 4 and Fig. S2 to Fig. 5. "MIM" and "Hermes" denote the tool used for segmenting the lesion in the PET images as explained in the paper.

**Tables S1A and S1B.** Wilcoxon rank sum test with continuity correction p-values (abbreviated to Wilc. R. Sum) and AUC for all 60 lesions in 39 interventional PET/CT scans when *KRAS* gene amplification is grouped with *KRAS* missense mutation. Values obtained without and with PVE and uptake time corrections as well as for derivative metrics as tumor-to-liver ratio (SUVTLR) and tumor-to-blood ratio (SUR) are also provided.

**Table S1. A**

| Parameter                   | Max<br>HERMES               | Statistic                         |
|-----------------------------|-----------------------------|-----------------------------------|
| SUV<br>No corrections       | <i>0.13</i><br><i>0.614</i> | <i>Wilc. R. Sum</i><br><i>AUC</i> |
| SUV<br>PVE corrected        | <i>0.07</i><br><i>0.639</i> | <i>Wilc. R. Sum</i><br><i>AUC</i> |
| SUVTLR<br>PVE corrected     | <i>0.08</i><br><i>0.632</i> | <i>Wilc. R. Sum</i><br><i>AUC</i> |
| SUV<br>PVE + time corrected | <i>0.07</i><br><i>0.636</i> | <i>Wilc. R. Sum</i><br><i>AUC</i> |
| SUR<br>Time corrected       | <i>0.04</i><br><i>0.652</i> | <i>Wilc. R. Sum</i><br><i>AUC</i> |

**Table S1. B**

|                         | Mean         |              | Peak         |              | Max          |              | Statistic           |
|-------------------------|--------------|--------------|--------------|--------------|--------------|--------------|---------------------|
|                         | MIM          | HERMES       | MIM          | HERMES       | MIM          | HERMES       |                     |
| <i>SUR</i>              | <i>0.03</i>  | <i>0.006</i> | <i>0.03</i>  | <i>0.02</i>  | <i>0.01</i>  | <i>0.02</i>  | <i>Wilc. R. Sum</i> |
| <i>PVE + time corr.</i> | <i>0.669</i> | <i>0.708</i> | <i>0.665</i> | <i>0.680</i> | <i>0.690</i> | <i>0.672</i> | <i>AUC</i>          |

**Table S2.** Specificities and sensitivities for predicting *KRAS* mutations based on all 60 lesions using SUR metrics after PVE and uptake time corrections when *KRAS* gene amplification is grouped with *KRAS+*. The rounded values obtained for contours drawn by different operators using different type of segmentation algorithms within different software platforms are listed.

|                                  | <b>Specificity</b> | <b>Sensitivity</b> | <b>Sensitivity +<br/>Specificity</b> |
|----------------------------------|--------------------|--------------------|--------------------------------------|
| <u><b>SUR<sub>MEAN</sub></b></u> |                    |                    |                                      |
| <b>MIM</b>                       | <b>0.72</b>        | <b>0.71</b>        | <b>1.43</b>                          |
| <b>Hermes</b>                    | <b>0.81</b>        | <b>0.64</b>        | <b>1.46</b>                          |
| <u><b>SUR<sub>PEAK</sub></b></u> |                    |                    |                                      |
| <b>MIM</b>                       | <b>0.66</b>        | <b>0.75</b>        | <b>1.40</b>                          |
| <b>Hermes</b>                    | <b>0.66</b>        | <b>0.79</b>        | <b>1.44</b>                          |
| <u><b>SUR<sub>MAX</sub></b></u>  |                    |                    |                                      |
| <b>MIM</b>                       | <b>0.72</b>        | <b>0.75</b>        | <b>1.47</b>                          |
| <b>Hermes</b>                    | <b>0.66</b>        | <b>0.79</b>        | <b>1.44</b>                          |

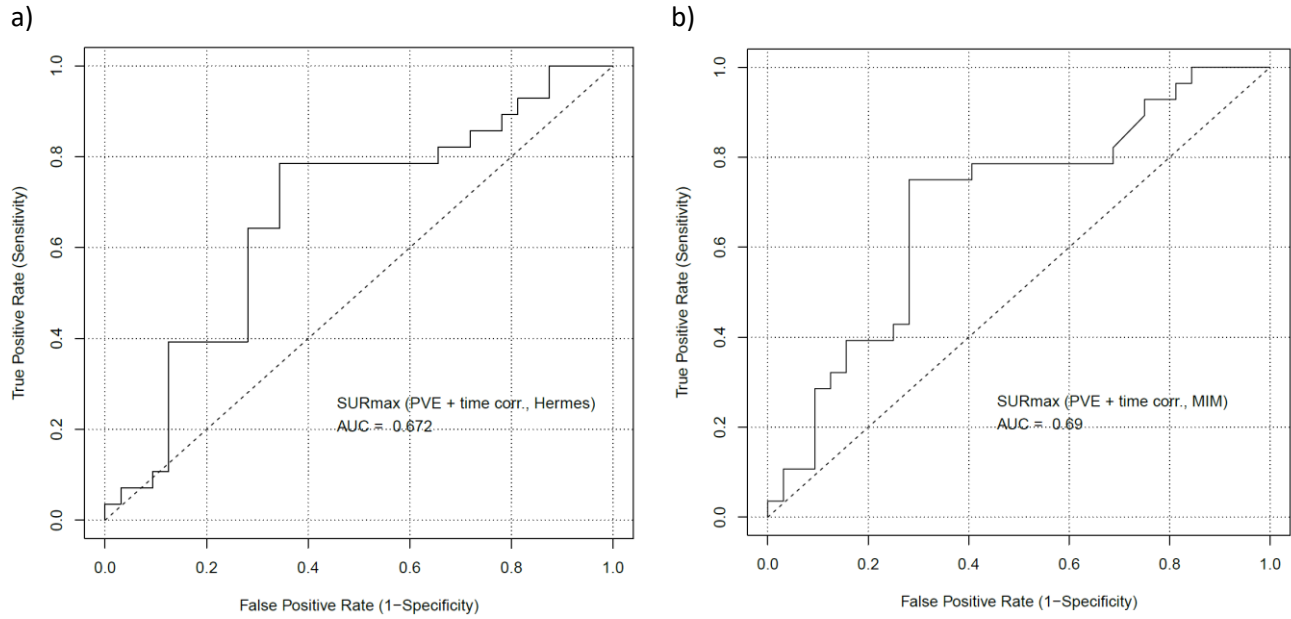

**Fig. S1.** Receiver operating characteristic (ROC) curves and AUC values for predicting CLM *KRAS* mutations (*KRAS* gene amplification is grouped with *KRAS* missense mutations) based on all 60 lesions and SUR<sub>MAX</sub> with both corrections for Hermes (a, left) and MIM segmentations (b, right).

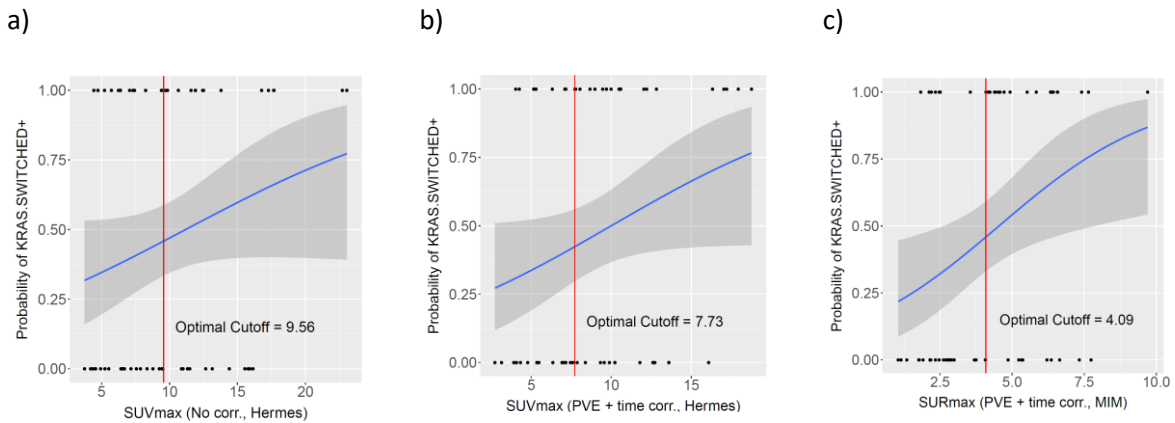

**Fig. S2.** Logistic regression curves based on all 60 lesions for SUV<sub>MAX</sub> without any corrections (a), SUV<sub>MAX</sub> with both PVE and uptake time corrections, (b), and for SUR<sub>MAX</sub> with both corrections (c), when *KRAS* gene amplification is grouped with *KRAS* missense mutations. Dark gray shaded areas represent the 95% confidence intervals around the probability values. Individual data points are shown with dots at probability levels of 0.00 and 1.00.
